# Supplementary material
Source: MDPI journal article supplement (https://www.mdpi.com/2077-0472/13/11/2078)
Supplement: s1 [file s1]

# The Agritourism Value Chain: An application to the Dehesa Areas of Extremadura

## Supplementary Materials:

|                                                                         |                                                                                                                                                                                                                                                                                                                                                                                                                                                                                                                                                                                                                                                                                                                                                                                                                                                                                                                                                                                                                 |                                                                                                                                               |
|-------------------------------------------------------------------------|-----------------------------------------------------------------------------------------------------------------------------------------------------------------------------------------------------------------------------------------------------------------------------------------------------------------------------------------------------------------------------------------------------------------------------------------------------------------------------------------------------------------------------------------------------------------------------------------------------------------------------------------------------------------------------------------------------------------------------------------------------------------------------------------------------------------------------------------------------------------------------------------------------------------------------------------------------------------------------------------------------------------|-----------------------------------------------------------------------------------------------------------------------------------------------|
| <b>LEVEL 1: BASIC CORE</b><br>(Associated with the Territory)           | <b>Group 1: Products of the Extremaduran dehesa (pasture):</b> <ul style="list-style-type: none"> <li>- Iberian pork, beef and lamb with a <b>quality seal</b>.</li> <li>- Holm oak / cork oak <b>pruning</b>: firewood, cork, charcoal and charcoal for heating and cooking, etc.</li> <li>- <b>Craft trades</b>: charcoal maker, stone cutter, dry stone builder, shepherd, woodcutter, cork maker, leather maker.</li> <li>- <b>Landscape</b>: balance between natural and semi-natural ecosystems (dehesa) unique in Europe.</li> <li>- <b>Gastronomic tourism</b>: associated with pastureland trades in certain times of the year and tasks.</li> </ul>                                                                                                                                                                                                                                                                                                                                                   | <b>Group 8: Training, Research and Innovation:</b><br>Existence of universities, training courses, innovation and dissemination centers, etc. |
|                                                                         | <b>Group 2: Producers and infrastructures of the Extremaduran dehesa:</b> <ul style="list-style-type: none"> <li>- <b>Producers (local)</b>: livestock breeders, farmers, foresters, etc.</li> <li>- <b>Infrastructures</b>: typical agricultural and livestock complexes (housing, orchard, enclosures and livestock maintenance, silos for harvesting, open plots, tents, water collection ponds and tanks, livestock escape control) and <b>access infrastructures</b> (tracks, roads and trails).</li> <li>- Specific <b>tools and utensils</b> of traditional crafts and trades almost forgotten (extraction of cork, charcoal and charcoal, planting and harvesting, etc.).</li> <li>- <b>Uses and uses</b> in the pasture: pastures, pruning "ramoneo", firewood of <i>Quercus</i> species, cork harvesting, hunting, gathering of fruits such as acorns for multiple uses, beehives, etc.</li> </ul>                                                                                                    |                                                                                                                                               |
|                                                                         | <b>Group 3: Tourism demand:</b> <ul style="list-style-type: none"> <li>- <b>Specialized tourist</b> (in quality, sustainability, culture and traditions), looking for: <b>active</b> experiences, direct learning with the <b>local community</b> about <b>traditional uses</b>.</li> </ul>                                                                                                                                                                                                                                                                                                                                                                                                                                                                                                                                                                                                                                                                                                                     |                                                                                                                                               |
| <b>LEVEL 2: COMPLEMENT TO LEVEL 1</b><br>(Associated with Distribution) | <b>Group 4.1: Distribution area:</b> <ul style="list-style-type: none"> <li>- <b>Local stores</b>: sale of agricultural and livestock products and handicrafts to the local community and tourists.</li> <li>- <b>Specialized trade</b>: for the sale of typical handcrafted products of the Extremadura pasture (pork jerky, beef and lamb from Extremadura, cheeses, game jerky, crafts made with oak and/or cork oak wood, etc.).</li> <li>- <b>Direct sales areas</b> in the <b>agritourism lodging</b> (the farm itself) of all or most of the products extracted from the dehesa in question, including guided excursions, photographic safaris, etc.</li> <li>- <b>Intermediaries</b>: responsible for <b>buying from the livestock producer and transporting</b> the product for <b>semi-transformation prior to marketing</b> (for example, lamb and transport to the slaughterhouse for cutting and final sale in local commerce, or the sale of fruit from the field to the final store).</li> </ul> | <b>Group 8: Training, Research and Innovation:</b><br>Existence of universities, training courses, innovation and dissemination centers, etc. |
|                                                                         | <b>Group 4.2: Exceptional distribution areas (poorly developed):</b> <ul style="list-style-type: none"> <li>- <b>Livestock fairs</b>: for the exhibition and sale of native livestock and/or seed plants widely used in Extremadura's pasture areas (very famous are those of Zafra, Trujillo, etc.).</li> <li>- <b>Agricultural machinery fairs</b>: in which indirectly there are show cooking areas where the goodness of the agricultural and livestock products extracted from the pastures of Extremadura can be divulged.</li> </ul>                                                                                                                                                                                                                                                                                                                                                                                                                                                                     |                                                                                                                                               |

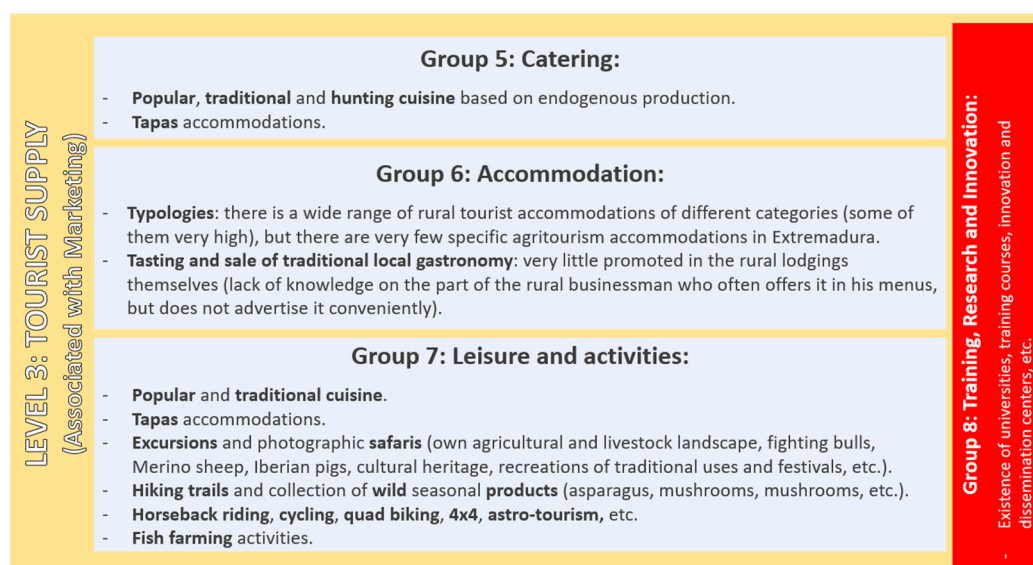

**Figure S1.** Global value chain of agritourism in Extremaduran dehesa land use. Source: own elaboration based on the research works of [44] and [68].
